# Supplementary material for: Detection of Oil Spills in the Northern South China Sea Using Landsat-8 OLI
Source: MDPI journal article supplement (doi:10.3390/rs14163966), 2022-08-15
Supplement: s1 [file s1]

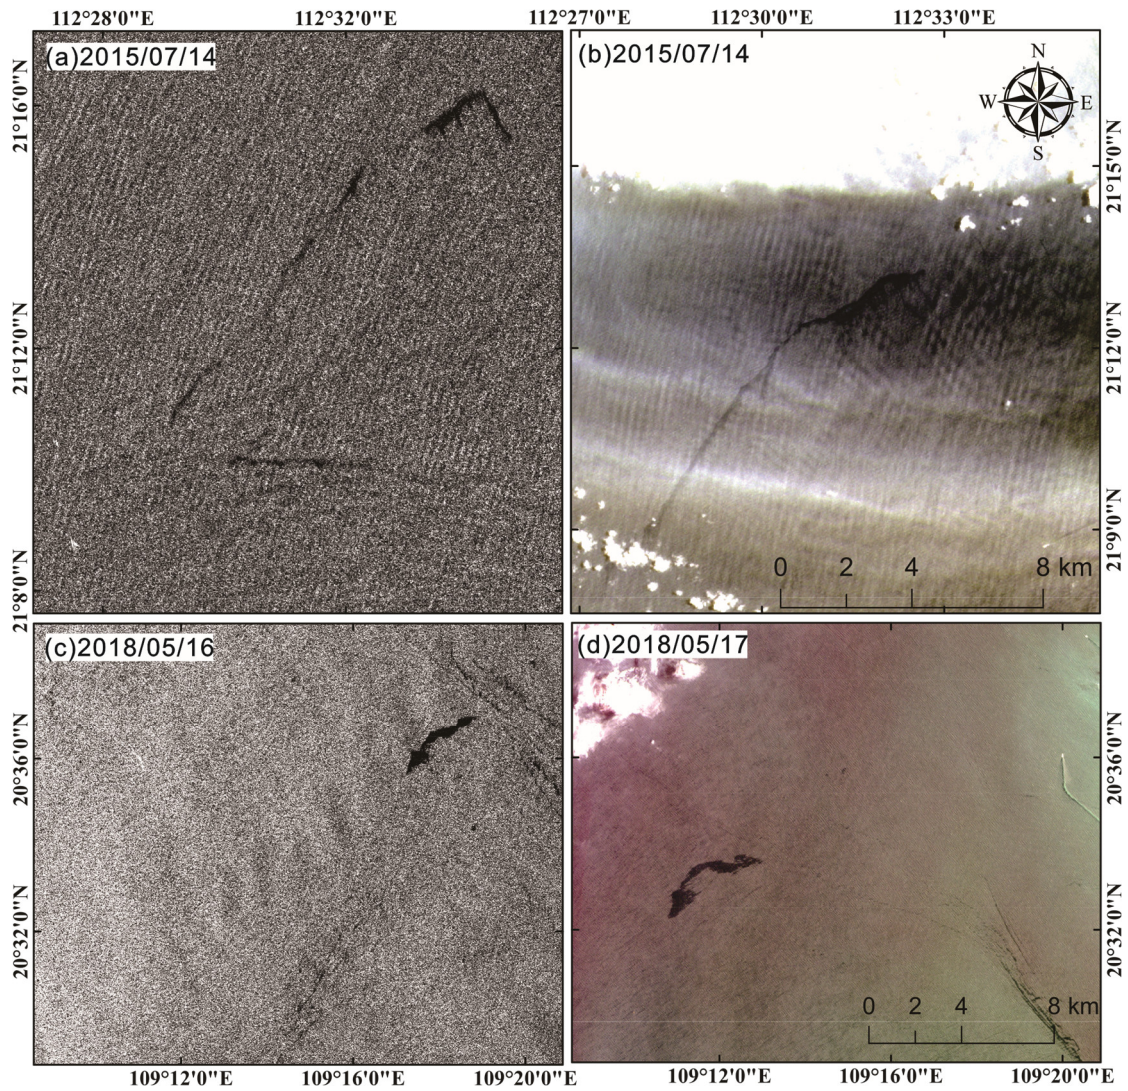

Figure S1. Comparison of images captured on July 14, 2015 between (a) Sentinel-1 SAR, UTC 10:40, slick area 2.8 km<sup>2</sup>, and (b) Landsat-8 OLI, UTC 02:52, slick area 2.9 km<sup>2</sup>. The oil slick extended ~5 km to the northeast during the ~8 h time difference with some subtle changes in shapes. Images pair from (c) Sentinel-1 SAR, May 16, 2018, UTC 10:49, slick area 1.5 km<sup>2</sup>, and (d) Landsat-8 OLI, May 17, 2018, UTC 3:04, slick area 2.1 km<sup>2</sup>. The oil slick moved ~13 km to the southwest during the ~16 h time difference with minor changes in shape.

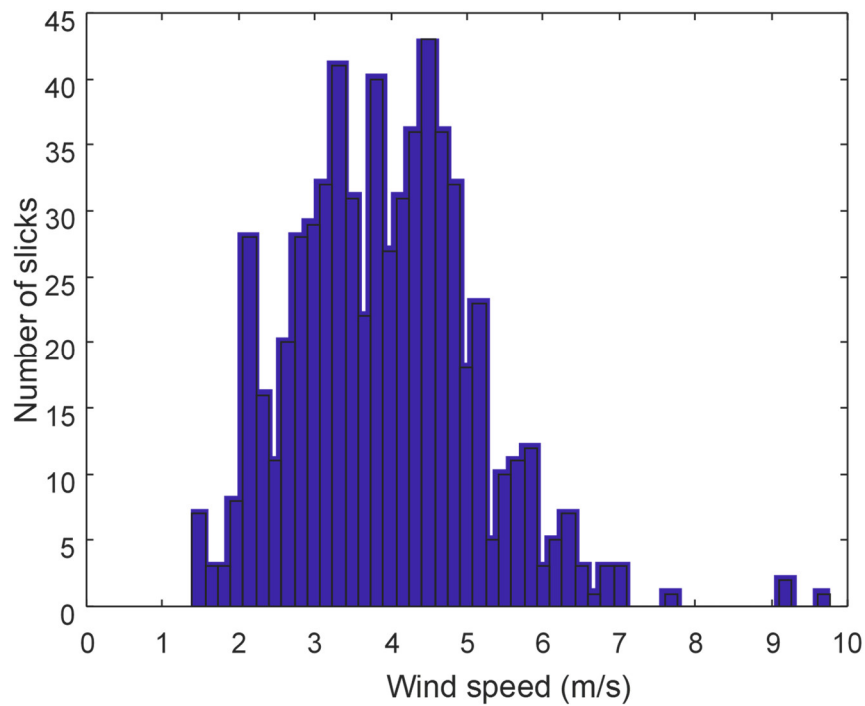

**Figure S2.** Histogram of wind speed with all the delineated slicks. The wind speed (at 10 m) data are from NOAA Climate Data Record (CDR) Ocean Near Surface Atmospheric Characteristics, Version 2 (<http://doi.org/10.7289/V55T3HH0>), with a time-interval of 3 h and spatial resolution of 0.25 degree. The wind data was interpolated spatially and temporarily on Google Earth Engine (GEE).
